# Supplementary material
Source: PubMed Central journal article supplement (PMC10231576)
Supplement: ebmental-2021-300307supp001.pdf [file ebmental-2021-300307supp001.pdf]

**Supplementary Table 1. Descriptive characteristics of the stepwise excluded cohort.**

|                                           | Exclusion because of non-conscription |                        |                      | Exclusion because of no cognitive assessment (or duplicate value n=40) |                      |                      |
|-------------------------------------------|---------------------------------------|------------------------|----------------------|------------------------------------------------------------------------|----------------------|----------------------|
|                                           | Excluded                              | Eligible for inclusion | p-value <sup>a</sup> | Excluded                                                               | Main analytic sample | p-value <sup>a</sup> |
| Total number of observations, (%)         | 78554                                 | 638966                 |                      | 138296                                                                 | 579224               |                      |
| Born by caesarean section, n (%)          | 10210 (13.0)                          | 62778 (9.8)            | <0.001               | 16617 (12.0)                                                           | 56371 (9.7)          | <0.001               |
| General cognitive ability, mean (SD)      | -                                     | -                      | -                    | -                                                                      | -                    | -                    |
| Age at conscription (years), median (IQR) | -                                     | -                      | -                    | 18.3 (18.2, 18.6)                                                      | 18.3 (18.1, 18.5)    | <0.001               |
| Birth weight (grams), mean (SD)           | 3454.5 (680.1)                        | 3575.1 (540.9)         | <0.001               | 3492.1 (635.1)                                                         | 3578.6 (538.1)       | <0.001               |
| Foetal Growth, No (%)                     |                                       |                        | <0.001               |                                                                        |                      | <0.001               |
| Small for gestational age (<10th %ile)    | 9263 (11.8)                           | 62424 (9.8)            |                      | 15565 (11.3)                                                           | 56122 (9.7)          |                      |
| Appropriate for gestational age           | 61484 (78.3)                          | 511617 (80.1)          |                      | 108872 (78.7)                                                          | 464229 (80.1)        |                      |
| Large for gestational age (>90th %ile)    | 7807 (9.9)                            | 64925 (10.2)           |                      | 13859 (10.0)                                                           | 58873 (10.2)         |                      |
| Gestational age (weeks), mean (SD)        | 39.0 (2.6)                            | 39.6 (1.8)             | <0.001               | 39.2 (2.3)                                                             | 39.6 (1.8)           | <0.001               |
| Gestational periods, No (%)               |                                       |                        | <0.001               |                                                                        |                      | <0.001               |
| Extremely preterm (<28 wGA)               | 750 (1.0)                             | 279 (<1)               |                      | 805 (0.6)                                                              | 224 (<1)             |                      |
| Very preterm (28-31 wGA)                  | 1223 (1.6)                            | 2107 (0.3)             |                      | 1494 (1.1)                                                             | 1836 (0.3)           |                      |
| Moderate to Late Preterm (32-36 wGA)      | 5328 (6.8)                            | 28150 (4.4)            |                      | 8459 (6.1)                                                             | 25019 (4.3)          |                      |
| Early term (37-38 wGA)                    | 14940 (19.0)                          | 104967 (16.4)          |                      | 25894 (18.7)                                                           | 94013 (16.2)         |                      |
| Full-term (39-40 wGA)                     | 36779 (46.8)                          | 314418 (49.2)          |                      | 66319 (48.0)                                                           | 284878 (49.2)        |                      |
| Late term (41 wGA)                        | 12846 (16.4)                          | 121179 (19.0)          |                      | 23229 (16.8)                                                           | 110796 (19.1)        |                      |
| Post term (≥42 wGA)                       | 6688 (8.5)                            | 67866 (10.6)           |                      | 12096 (8.7)                                                            | 62458 (10.8)         |                      |
| Modified Robson classification, No (%)    |                                       |                        | <0.001               |                                                                        |                      | <0.001               |
| 1+2                                       | 27918 (35.5)                          | 247532 (38.7)          |                      | 49774 (36.0)                                                           | 225676 (39.0)        |                      |
| 3+4                                       | 39967 (50.9)                          | 336418 (52.7)          |                      | 71747 (51.9)                                                           | 304638 (52.6)        |                      |
| 5                                         | 2017 (2.6)                            | 11820 (1.8)            |                      | 3534 (2.6)                                                             | 10303 (1.8)          |                      |
| 6+7                                       | 1868 (2.4)                            | 12314 (1.9)            |                      | 3013 (2.2)                                                             | 11169 (1.9)          |                      |
| 9+10                                      | 6784 (8.6)                            | 30882 (4.8)            |                      | 10228 (7.4)                                                            | 27438 (4.7)          |                      |
| Parity, median (IQR)                      | 2.0 (1.0, 2.0)                        | 2.0 (1.0, 2.0)         | <0.001               | 2.0 (1.0, 2.0)                                                         | 2.0 (1.0, 2.0)       | <0.001               |
| Maternal age at birth (years), mean (SD)  | 28.0 (5.3)                            | 27.7 (5.0)             | <0.001               | 28.0 (5.2)                                                             | 27.6 (5.0)           | <0.001               |
| Categories of maternal age, No (%)        |                                       |                        | <0.001               |                                                                        |                      | <0.001               |
| <20 years                                 | 3646 (4.6)                            | 28907 (4.5)            |                      | 6086 (4.4)                                                             | 26467 (4.6)          |                      |
| 20-24 years                               | 20966 (26.7)                          | 175442 (27.5)          |                      | 36350 (26.3)                                                           | 160058 (27.6)        |                      |
| 25-29 years                               | 27362 (34.8)                          | 239170 (37.4)          |                      | 49002 (35.4)                                                           | 217530 (37.6)        |                      |
| 30-34 years                               | 18023 (22.9)                          | 141044 (22.1)          |                      | 31987 (23.1)                                                           | 127080 (21.9)        |                      |
| ≥35 years                                 | 8557 (10.9)                           | 54403 (8.5)            |                      | 14871 (10.8)                                                           | 48089 (8.3)          |                      |
| Maternal diabetes mellitus, No (%)        | 564 (0.7)                             | 2944 (0.5)             | <0.001               | 943 (0.7)                                                              | 2565 (0.4)           | <0.001               |
| Maternal hypertension, No (%)             | 185 (0.2)                             | 750 (0.1)              | <0.001               | 321 (0.2)                                                              | 614 (0.1)            | <0.001               |
| Preeclampsia, No (%)                      | 1034 (1.3)                            | 4192 (0.7)             | <0.001               | 1743 (1.3)                                                             | 3483 (0.6)           | <0.001               |
| Highest parental education, No (%)        |                                       |                        | <0.001               |                                                                        |                      | <0.001               |
| Primary Education                         | 15401 (19.6)                          | 83770 (13.1)           |                      | 23838 (17.2)                                                           | 75333 (13.0)         |                      |
| Secondary Education                       | 40470 (51.5)                          | 320235 (50.1)          |                      | 70717 (51.1)                                                           | 289988 (50.1)        |                      |
| University Education                      | 22683 (28.9)                          | 234961 (36.8)          |                      | 43741 (31.6)                                                           | 213903 (36.9)        |                      |
| Familial disposable income, No (%)        |                                       |                        | <0.001               |                                                                        |                      | <0.001               |
| Quintile 1                                | 17165 (21.9)                          | 77319 (12.1)           |                      | 27347 (19.8)                                                           | 67137 (11.6)         |                      |
| Quintile 2                                | 17828 (22.7)                          | 128307 (20.1)          |                      | 31291 (22.6)                                                           | 114844 (19.8)        |                      |
| Quintile 3                                | 16001 (20.4)                          | 150713 (23.6)          |                      | 29537 (21.4)                                                           | 137177 (23.7)        |                      |
| Quintile 4                                | 14394 (18.3)                          | 145327 (22.7)          |                      | 26374 (19.1)                                                           | 133347 (23.0)        |                      |
| Quintile 5                                | 13166 (16.8)                          | 137300 (21.5)          |                      | 23747 (17.2)                                                           | 126719 (21.9)        |                      |
| Parent(s) born in Sweden, No (%)          |                                       |                        | <0.001               |                                                                        |                      | <0.001               |
| Both parents                              | 53446 (68.0)                          | 550494 (86.2)          |                      | 103237 (74.6)                                                          | 500703 (86.4)        |                      |
| One parent                                | 11921 (15.2)                          | 61838 (9.7)            |                      | 18562 (13.4)                                                           | 55197 (9.5)          |                      |
| Neither parent                            | 13187 (16.8)                          | 26634 (4.2)            |                      | 16497 (11.9)                                                           | 23324 (4.0)          |                      |
| Parental labour market position, No (%)   |                                       |                        | <0.001               |                                                                        |                      | <0.001               |
| Others                                    | 6793 (8.6)                            | 24844 (3.9)            |                      | 9833 (7.1)                                                             | 21804 (3.8)          |                      |
| Unskilled workers                         | 17539 (22.3)                          | 113988 (17.8)          |                      | 28830 (20.8)                                                           | 102697 (17.7)        |                      |
| Skilled workers                           | 16035 (20.4)                          | 123327 (19.3)          |                      | 27626 (20.0)                                                           | 111736 (19.3)        |                      |
| Self-employed and farmers                 | 4362 (5.6)                            | 39077 (6.1)            |                      | 7784 (5.6)                                                             | 35655 (6.2)          |                      |
| Non-manual workers at lower level         | 9814 (12.5)                           | 95520 (14.9)           |                      | 18436 (13.3)                                                           | 86898 (15.0)         |                      |
| Non-manual workers at intermediate level  | 14484 (18.4)                          | 153104 (24.0)          |                      | 27513 (19.9)                                                           | 140075 (24.2)        |                      |
| Non-manual workers at higher level        | 9527 (12.1)                           | 89106 (13.9)           |                      | 18274 (13.2)                                                           | 80359 (13.9)         |                      |

<sup>a</sup>Calculated using  $\chi^2$  test (categorical), t-test (continuous), and Wilcoxon rank-sum test (continuous skewed).

Abbreviations: IQR, interquartile range; No., number of observations; SD, standard deviation; wGA, weeks of gestational age; %ile, percentile.

**Supplementary Table 2. Descriptive characteristics of the siblings in the main cohort and the sub-cohort with detailed delivery data, stratified by mode of delivery.**

|                                           | Main Cohort       |                       | Sub-cohort with detailed delivery data |                            |                                |
|-------------------------------------------|-------------------|-----------------------|----------------------------------------|----------------------------|--------------------------------|
|                                           | Vaginal Delivery  | Any Caesarean Section | Vaginal Delivery                       | Elective Caesarean Section | Non-elective Caesarean Section |
| Total number of observations, (%)         | 176343 (91.2)     | 17083 (8.8)           | 29734 (93.5)                           | 990 (3.1)                  | 1075 (3.4)                     |
| Age at conscription (years), median (IQR) | 18.3 (18.1, 18.5) | 18.3 (18.1, 18.5)     | 18.3 (18.1, 18.5)                      | 18.3 (18.1, 18.5)          | 18.3 (18.1, 18.5)              |
| Birth weight (grams), mean (SD)           | 3625.1 (507.8)    | 3412.3 (651.6)        | 3641.1 (500.1)                         | 3446.9 (543.2)             | 3394.6 (758.0)                 |
| Foetal Growth, No (%)                     |                   |                       |                                        |                            |                                |
| Small for gestational age (<10th %ile)    | 14920 (8.5)       | 2051 (12.0)           | 1949 (6.6)                             | 73 (7.4)                   | 117 (10.9)                     |
| Appropriate for gestational age           | 142452 (80.8)     | 13066 (76.5)          | 24268 (81.6)                           | 783 (79.1)                 | 816 (75.9)                     |
| Large for gestational age (>90th %ile)    | 18971 (10.8)      | 1966 (11.5)           | 3517 (11.8)                            | 134 (13.5)                 | 142 (13.2)                     |
| Gestational age (weeks), mean (SD)        | 39.7 (1.6)        | 38.7 (2.2)            | 39.5 (1.5)                             | 38.1 (1.4)                 | 38.6 (2.9)                     |
| Gestational periods, No (%)               |                   |                       |                                        |                            |                                |
| Extremely preterm (<28 wGA)               | 35 (<1)           | 20 (0.1)              | <10                                    | <10                        | <10                            |
| Very preterm (28-31 wGA)                  | 246 (0.1)         | 199 (1.2)             | 25 (0.1)                               | <10                        | 22 (2.0)                       |
| Moderate to Late Preterm (32-36 wGA)      | 5710 (3.2)        | 1654 (9.7)            | 1043 (3.5)                             | 61 (6.2)                   | 177 (16.5)                     |
| Early term (37-38 wGA)                    | 25707 (14.6)      | 5536 (32.4)           | 5018 (16.9)                            | 610 (61.6)                 | 213 (19.8)                     |
| Full-term (39-40 wGA)                     | 89973 (51.0)      | 6671 (39.1)           | 16122 (54.2)                           | 270 (27.3)                 | 371 (34.5)                     |
| Late term (41 wGA)                        | 35635 (20.2)      | 1641 (9.6)            | 5494 (18.5)                            | 30 (3.0)                   | 174 (16.2)                     |
| Post term (≥42 wGA)                       | 19037 (10.8)      | 1362 (8.0)            | 2031 (6.8)                             | 15 (1.5)                   | 114 (10.6)                     |
| Modified Robson classification, No (%)    |                   |                       |                                        |                            |                                |
| 1+2                                       | 59596 (33.8)      | 5233 (30.6)           | 9529 (32.0)                            | 163 (16.5)                 | 480 (44.7)                     |
| 3+4                                       | 105065 (59.6)     | 3571 (20.9)           | 18154 (61.1)                           | 161 (16.3)                 | 197 (18.3)                     |
| 5                                         | 3528 (2.0)        | 4978 (29.1)           | 746 (2.5)                              | 498 (50.3)                 | 128 (11.9)                     |
| 6+7                                       | 1764 (1.0)        | 1614 (9.4)            | 159 (0.5)                              | 106 (10.7)                 | 94 (8.7)                       |
| 9+10                                      | 6390 (3.6)        | 1687 (9.9)            | 1146 (3.9)                             | 62 (6.3)                   | 176 (16.4)                     |
| Parity, median (IQR)                      | 2.0 (1.0, 2.0)    | 2.0 (1.0, 2.0)        | 2.0 (1.0, 2.0)                         | 2.0 (1.0, 3.0)             | 1.0 (1.0, 2.0)                 |
| Maternal age at birth (years), mean (SD)  | 27.4 (4.6)        | 28.6 (5.1)            | 27.8 (4.4)                             | 29.6 (4.8)                 | 27.8 (4.5)                     |
| Categories of maternal age, No (%)        |                   |                       |                                        |                            |                                |
| <20 years                                 | 6808 (3.9)        | 485 (2.8)             | 611 (2.1)                              | <10                        | 25 (2.3)                       |
| 20-24 years                               | 51330 (29.1)      | 3911 (22.9)           | 7829 (26.3)                            | 174 (17.6)                 | 280 (26.0)                     |
| 25-29 years                               | 69505 (39.4)      | 6411 (37.5)           | 12433 (41.8)                           | 385 (38.9)                 | 449 (41.8)                     |
| 30-34 years                               | 37783 (21.4)      | 4266 (25.0)           | 6946 (23.4)                            | 270 (27.3)                 | 243 (22.6)                     |
| ≥35 years                                 | 10917 (6.2)       | 2010 (11.8)           | 1915 (6.4)                             | 156 (15.8)                 | 78 (7.3)                       |
| Maternal diabetes mellitus, No (%)        | 494 (0.3)         | 225 (1.3)             | 132 (0.4)                              | 15 (1.5)                   | 11 (1.0)                       |
| Maternal hypertension, No (%)             | 128 (0.1)         | 45 (0.3)              | 47 (0.2)                               | <10                        | <10                            |
| Preeclampsia, No (%)                      | 695 (0.4)         | 241 (1.4)             | 330 (1.1)                              | 26 (2.6)                   | 56 (5.2)                       |
| Highest parental education, No (%)        |                   |                       |                                        |                            |                                |
| Primary Education                         | 20299 (11.5)      | 1977 (11.6)           | 2604 (8.8)                             | 78 (7.9)                   | 87 (8.1)                       |
| Secondary Education                       | 85351 (48.4)      | 7904 (46.3)           | 14639 (49.2)                           | 481 (48.6)                 | 533 (49.6)                     |
| University Education                      | 70693 (40.1)      | 7202 (42.2)           | 12491 (42.0)                           | 431 (43.5)                 | 455 (42.3)                     |
| Familial disposable income, No (%)        |                   |                       |                                        |                            |                                |
| Quintile 1                                | 18790 (10.7)      | 1969 (11.5)           | 6083 (20.5)                            | 194 (19.6)                 | 247 (23.0)                     |
| Quintile 2                                | 34737 (19.7)      | 3155 (18.5)           | 7663 (25.8)                            | 209 (21.1)                 | 265 (24.7)                     |
| Quintile 3                                | 41380 (23.5)      | 3781 (22.1)           | 6601 (22.2)                            | 214 (21.6)                 | 238 (22.1)                     |
| Quintile 4                                | 42455 (24.1)      | 3915 (22.9)           | 5249 (17.7)                            | 183 (18.5)                 | 182 (16.9)                     |
| Quintile 5                                | 38981 (22.1)      | 4263 (25.0)           | 4138 (13.9)                            | 190 (19.2)                 | 143 (13.3)                     |
| Parent(s) born in Sweden, No (%)          |                   |                       |                                        |                            |                                |
| Both parents                              | 156264 (88.6)     | 15030 (88.0)          | 25930 (87.2)                           | 846 (85.5)                 | 947 (88.1)                     |
| One parent                                | 14397 (8.2)       | 1450 (8.5)            | 2583 (8.7)                             | 114 (11.5)                 | 84 (7.8)                       |
| Neither parent                            | 5682 (3.2)        | 603 (3.5)             | 1221 (4.1)                             | 30 (3.0)                   | 44 (4.1)                       |
| Parental labour market position, No (%)   |                   |                       |                                        |                            |                                |
| Others                                    | 5776 (3.3)        | 553 (3.2)             | 1168 (3.9)                             | 42 (4.2)                   | 38 (3.5)                       |
| Unskilled workers                         | 29274 (16.6)      | 2691 (15.8)           | 4516 (15.2)                            | 152 (15.4)                 | 175 (16.3)                     |
| Skilled workers                           | 33544 (19.0)      | 3046 (17.8)           | 5726 (19.3)                            | 165 (16.7)                 | 214 (19.9)                     |
| Self-employed and farmers                 | 12207 (6.9)       | 1191 (7.0)            | 1950 (6.6)                             | 56 (5.7)                   | 73 (6.8)                       |
| Non-manual workers at lower level         | 24456 (13.9)      | 2382 (13.9)           | 3858 (13.0)                            | 146 (14.7)                 | 138 (12.8)                     |
| Non-manual workers at intermediate level  | 44432 (25.2)      | 4300 (25.2)           | 7457 (25.1)                            | 223 (22.5)                 | 254 (23.6)                     |
| Non-manual workers at higher level        | 26654 (15.1)      | 2920 (17.1)           | 5059 (17.0)                            | 206 (20.8)                 | 183 (17.0)                     |

Abbreviations: IQR, interquartile range; No., number of observations; SD, standard deviation; wGA, weeks of gestational age; %ile, percentile.

**Supplementary Table 3. Description of the original and modified Robson classification**

| <b>Description<sup>a</sup></b>                                                                                                                                                            | <b>Original Robson classification</b> | <b>Modified Robson classification</b> |
|-------------------------------------------------------------------------------------------------------------------------------------------------------------------------------------------|---------------------------------------|---------------------------------------|
| Nulliparous women with a single cephalic pregnancy, ≥37 weeks gestation in spontaneous labour                                                                                             | 1                                     | 1+2                                   |
| Nulliparous women with a single cephalic pregnancy, ≥37 weeks gestation who had labour induced or were delivered by caesarean section before labour                                       | 2                                     |                                       |
| Multiparous women without a previous caesarean section, with a single cephalic pregnancy, ≥37 weeks gestation in spontaneous labour                                                       | 3                                     | 3+4                                   |
| Multiparous women without a previous caesarean section, with a single cephalic pregnancy, ≥37 weeks gestation who had labour induced or were delivered by caesarean section before labour | 4                                     |                                       |
| All multiparous women with at least one previous caesarean section, with a single cephalic pregnancy, ≥37 weeks gestation                                                                 | 5                                     | 5                                     |
| All nulliparous women with a single breech pregnancy                                                                                                                                      | 6                                     | 6+7                                   |
| All multiparous with a single breech (including previous caesarean section)                                                                                                               | 7                                     |                                       |
| All multiparous women with a single breech pregnancy including women with previous caesarean section                                                                                      | 8                                     | N/A                                   |
| All women with a single pregnancy with a transverse or oblique lie, including women with previous caesarean section                                                                       | 9                                     | 9+10                                  |
| All women with a single cephalic pregnancy < 37 weeks gestation, including women with previous caesarean section                                                                          | 10                                    |                                       |

<sup>a</sup>As reported in the World Health Organization Robson Classification: Implementation Manual (ISBN: 978-92-4-151319-7, 2017)

**Supplementary Table 4. Elective and non-elective caesarean section and offspring general cognitive ability, by birth year, parity, maternal age, gestational periods, modified Robson classification, highest parental education and familial disposable income.**

|                                      | Mean Cognitive core |                                  |                              |                                                |                           | Mean Difference from Vaginal Delivery |                |         |                                        |                |         |
|--------------------------------------|---------------------|----------------------------------|------------------------------|------------------------------------------------|---------------------------|---------------------------------------|----------------|---------|----------------------------------------|----------------|---------|
|                                      | Vaginal<br>Mean     | Elective<br>Section<br>N Exposed | Caesarean<br>Section<br>Mean | Non-elective<br>Caesarean Section<br>N exposed | Caesarean Section<br>Mean | Elective<br>Section<br>β              | 95% CI         | p-value | Non-elective<br>Caesarean Section<br>β | 95% CI         | p-value |
| Birth year                           |                     |                                  |                              |                                                |                           |                                       |                |         |                                        |                |         |
| 1982-84                              | 100.6               | 3,927 (4.2%)                     | 99.7                         | 4,145 (4.4%)                                   | 99.9                      | -0.86                                 | -1.32 to -0.41 | <0.001  | -0.76                                  | -1.19 to -0.32 | 0.001   |
| 1985-87                              | 99.8                | 3,813 (4.2%)                     | 98.9                         | 4,135 (4.5%)                                   | 98.7                      | -0.91                                 | -1.36 to -0.45 | <0.001  | -1.19                                  | -1.62 to -0.75 | <0.001  |
| Parity                               |                     |                                  |                              |                                                |                           |                                       |                |         |                                        |                |         |
| 1                                    | 101.9               | 2,423 (3.2%)                     | 100.6                        | 5,009 (6.6%)                                   | 100.7                     | -1.27                                 | -1.85 to -0.69 | <0.001  | -1.17                                  | -1.58 to -0.77 | <0.001  |
| 2                                    | 99.6                | 3,244 (4.8%)                     | 98.7                         | 2,021 (3%)                                     | 98.8                      | -0.92                                 | -1.41 to -0.43 | <0.001  | -0.77                                  | -1.37 to -0.17 | 0.012   |
| 3                                    | 98.6                | 1,537 (5%)                       | 98                           | 865 (2.8%)                                     | 97.7                      | -0.66                                 | -1.38 to 0.06  | 0.071   | -0.90                                  | -1.84 to 0.04  | 0.060   |
| 4+                                   | 97.2                | 536 (4.8%)                       | 97.2                         | 385 (3.5%)                                     | 96.2                      | 0.05                                  | -1.14 to 1.24  | 0.934   | -0.96                                  | -2.43 to 0.51  | 0.202   |
| Maternal age                         |                     |                                  |                              |                                                |                           |                                       |                |         |                                        |                |         |
| <20                                  | 96.3                | 98 (1.8%)                        | 94.5                         | 235 (4.4%)                                     | 96                        | -1.76                                 | -4.70 to 1.18  | 0.241   | -0.34                                  | -2.12 to 1.44  | 0.706   |
| 20-24                                | 98.8                | 1,133 (2.6%)                     | 98.2                         | 1,972 (4.5%)                                   | 97.8                      | -0.66                                 | -1.48 to 0.16  | 0.114   | -1.01                                  | -1.64 to -0.39 | 0.001   |
| 25-29                                | 100.4               | 2,538 (3.7%)                     | 99.5                         | 2,977 (4.3%)                                   | 99.3                      | -0.93                                 | -1.49 to -0.37 | 0.001   | -1.14                                  | -1.65 to -0.62 | <0.001  |
| 30-34                                | 101.1               | 2,260 (4.9%)                     | 100.6                        | 1,968 (4.2%)                                   | 100.2                     | -0.53                                 | -1.12 to 0.07  | 0.083   | -0.89                                  | -1.52 to -0.25 | 0.006   |
| ≥35                                  | 101.6               | 1,711 (8.3%)                     | 100.5                        | 1,128 (5.5%)                                   | 100.7                     | -1.07                                 | -1.77 to -0.38 | 0.002   | -0.90                                  | -1.74 to -0.06 | 0.036   |
| Gestational period                   |                     |                                  |                              |                                                |                           |                                       |                |         |                                        |                |         |
| Extremely preterm (<28 wGA)          | 91.3                | <10                              | -                            | 29 (35.8%)                                     | 93.8                      | -                                     | -              | -       | -                                      | -              | -       |
| Very preterm (28-31 wGA)             | 96.3                | 42 (7.4%)                        | 92.9                         | 277 (48.9%)                                    | 94.8                      | -3.40                                 | -7.85 to 1.05  | 0.134   | -1.52                                  | -3.83 to 0.79  | 0.197   |
| Moderate to Late Preterm (32-36 wGA) | 99.7                | 506 (5.9%)                       | 99.1                         | 1,424 (16.7%)                                  | 98.5                      | -0.62                                 | -1.91 to 0.67  | 0.346   | -1.16                                  | -1.95 to -0.38 | 0.004   |
| Early term (37-38 wGA)               | 100.1               | 4,723 (13.5%)                    | 99.2                         | 1,589 (4.5%)                                   | 99.3                      | -0.85                                 | -1.29 to -0.42 | <0.001  | -0.76                                  | -1.46 to -0.07 | 0.032   |
| Full-term (39-40 wGA)                | 100.4               | 2,116 (2.2%)                     | 99.3                         | 2,672 (2.8%)                                   | 99.6                      | -1.12                                 | -1.72 to -0.53 | <0.001  | -0.80                                  | -1.34 to -0.27 | 0.003   |
| Late term (41 wGA)                   | 100.3               | 209 (0.6%)                       | 99.5                         | 1,337 (4%)                                     | 99.1                      | -0.80                                 | -2.70 to 1.10  | 0.411   | -1.19                                  | -1.95 to -0.43 | 0.002   |
| Post term (≥42 wGA)                  | 100                 | 143 (1.0%)                       | 97.6                         | 952 (6.9%)                                     | 99.6                      | -2.32                                 | -4.79 to 0.14  | 0.064   | -0.33                                  | -1.26 to 0.60  | 0.484   |
| Modified Robson classification       |                     |                                  |                              |                                                |                           |                                       |                |         |                                        |                |         |
| 1 & 2                                | 100.3               | 1,755 (2.5%)                     | 98.7                         | 3,912 (5.6%)                                   | 99.3                      | -1.58                                 | -2.25 to -0.90 | <0.001  | -1.02                                  | -1.48 to -0.56 | <0.001  |
| 3 & 4                                | 100.2               | 2,620 (2.7%)                     | 99.5                         | 1,791 (1.8%)                                   | 99.6                      | -0.75                                 | -1.29 to -0.21 | 0.006   | -0.65                                  | -1.30 to -0.01 | 0.047   |
| 5                                    | 99.6                | 2,068 (39.6%)                    | 99.5                         | 440 (8.4%)                                     | 99.6                      | -0.14                                 | -0.94 to 0.67  | 0.743   | -0.07                                  | -1.44 to 1.30  | 0.923   |
| 6 & 7                                | 100                 | 781 (33%)                        | 99.3                         | 601 (25.4%)                                    | 99.4                      | -0.75                                 | -2.05 to 0.55  | 0.258   | -0.66                                  | -2.00 to 0.68  | 0.336   |
| 9 & 10                               | 100                 | 516 (5.5%)                       | 99                           | 1,536 (16.5%)                                  | 98.3                      | -0.94                                 | -2.21 to 0.34  | 0.151   | -1.70                                  | -2.46 to -0.94 | <0.001  |
| Highest Parental education           |                     |                                  |                              |                                                |                           |                                       |                |         |                                        |                |         |
| Primary Education                    | 95.2                | 810 (4.3%)                       | 94.7                         | 890 (4.7%)                                     | 94.3                      | -0.46                                 | -1.41 to 0.48  | 0.336   | -0.90                                  | -1.80 to 0.00  | 0.051   |
| Secondary Education                  | 98.8                | 3,721 (3.9%)                     | 97.9                         | 4,257 (4.5%)                                   | 97.8                      | -0.85                                 | -1.31 to -0.40 | <0.001  | -0.95                                  | -1.38 to -0.52 | <0.001  |
| University Education                 | 103.5               | 3,209 (4.5%)                     | 102.4                        | 3,133 (4.3%)                                   | 102.3                     | -1.11                                 | -1.62 to -0.60 | <0.001  | -1.18                                  | -1.68 to -0.68 | <0.001  |
| Familial disposable income           |                     |                                  |                              |                                                |                           |                                       |                |         |                                        |                |         |
| Quintile 1                           | 100.2               | 1,445 (3.7%)                     | 99                           | 1,829 (4.7%)                                   | 99.6                      | -1.24                                 | -1.98 to -0.50 | 0.001   | -0.62                                  | -1.30 to 0.06  | 0.072   |
| Quintile 2                           | 99.9                | 1,709 (3.7%)                     | 98.8                         | 2,056 (4.5%)                                   | 98.8                      | -1.09                                 | -1.77 to -0.41 | 0.002   | -1.10                                  | -1.72 to -0.49 | <0.001  |
| Quintile 3                           | 99.9                | 1,647 (4.1%)                     | 99.2                         | 1,814 (4.5%)                                   | 98.9                      | -0.74                                 | -1.43 to -0.05 | 0.036   | -1.01                                  | -1.65 to -0.38 | 0.002   |
| Quintile 4                           | 100.2               | 1,481 (4.4%)                     | 99.3                         | 1,394 (4.2%)                                   | 98.8                      | -0.90                                 | -1.64 to -0.17 | 0.015   | -1.45                                  | -2.18 to -0.71 | <0.001  |
| Quintile 5                           | 101.4               | 1,458 (5.3%)                     | 100.7                        | 1,187 (4.3%)                                   | 100.3                     | -0.62                                 | -1.36 to 0.11  | 0.097   | -1.08                                  | -1.90 to -0.26 | 0.010   |

**Supplementary Table 5. The difference in the relationship between caesarean section and general cognitive ability by the type of test-battery that the conscript performed (SEB80 vs CAT-SEB).**

|                                | SEB80 (N=276 567) |                |         | CAT-SEB (N=302 657) |                |         | $\beta$ -Difference | 95% CI        | p-value |
|--------------------------------|-------------------|----------------|---------|---------------------|----------------|---------|---------------------|---------------|---------|
|                                | $\beta$           | 95% CI         | p-value | $\beta$             | 95% CI         | p-value |                     |               |         |
| Vaginal delivery               | Ref.              | -              | -       | Ref.                | -              | -       |                     |               |         |
| Caesarean Section <sup>a</sup> | -0.70             | -0.90 to -0.51 | <0.001  | -0.951              | -1.11 to -0.79 | <0.001  | 0.25                | -0.00 to 0.50 | 0.054   |

<sup>a</sup>Adjusted for: maternal age, preeclampsia, hypertension, and diabetes mellitus, family disposable income, parental country of birth, parental labour market position, offspring year of birth, parity, birth weight standardized to gestational age and gestational age

**Supplementary Table 6. The relationship between caesarean section and general cognitive ability and its components.**

|                                    | N       | $\beta^{a,b}$ | 95% CI         | P-value |
|------------------------------------|---------|---------------|----------------|---------|
| <b>SEB80</b>                       |         |               |                |         |
| G-factor                           | 142 573 | -0.93         | -1.22 to -0.64 | <0.001  |
| Technical                          | 142 573 | -0.93         | -1.24 to -0.63 | <0.001  |
| Logic                              | 142 573 | -0.69         | -0.98 to -0.39 | <0.001  |
| Verbal                             | 142 573 | -0.69         | -0.98 to -0.40 | <0.001  |
| Visuospatial                       | 142 573 | -0.85         | -1.16 to -0.55 | <0.001  |
| <b>CAT-SEB</b>                     |         |               |                |         |
| G-factor                           | 299 749 | -0.56         | -0.74 to -0.39 | <0.001  |
| Spatial (General visualization)    | 299 749 | -0.42         | -0.59 to -0.26 | <0.001  |
| Verbal (Crystallized intelligence) | 299 749 | -0.96         | -1.12 to -0.80 | <0.001  |

<sup>a</sup>Mean difference as compared to those born vaginally

<sup>b</sup>Adjusted for: maternal age, preeclampsia, hypertension, and diabetes mellitus, family disposable income, parental country of birth, parental labour market position, offspring year of birth, parity and birth weight standardized to gestational age and gestational age

### Supplementary Table 7. Sensitivity analysis using prematurity as a positive causal outcome.

| Prematurity                            | N       | Odds ratio <sup>a</sup> | 95% CI       | P-value |
|----------------------------------------|---------|-------------------------|--------------|---------|
| Conventional Crude                     | 579 224 | 3.50                    | 3.40 to 3.60 | <0.001  |
| Conventional Adjusted <sup>b</sup>     | 579 224 | 3.33                    | 3.23 to 3.43 | <0.001  |
| Sibling-analysis Crude                 | 13 892  | 5.94                    | 5.11 to 6.92 | <0.001  |
| Sibling-analysis Adjusted <sup>c</sup> | 13 892  | 7.43                    | 6.28 to 8.79 | <0.001  |

<sup>a</sup>As compared to those born vaginally

<sup>b</sup>Adjusted for: maternal age, preeclampsia, hypertension, and diabetes mellitus, family disposable income, parental country of birth, parental labour market position, offspring year of birth, parity and birth weight standardized to gestational age

<sup>c</sup>Adjusted for same as above excluding family disposable income, parental country of birth, highest parental education and parental labour market position

### Supplementary Table 8. Sensitivity analysis of the relationship between caesarean section and general cognitive ability, as compared to vaginal delivery without instrumental support.

|                           | N exposed       | $\beta^a$ | 95% CI         | P-value |
|---------------------------|-----------------|-----------|----------------|---------|
| Vaginal delivery          | 483 603 (83.5%) | Ref.      | -              | -       |
| Assisted vaginal delivery | 39 250 (6.8%)   | -0.35     | -0.50 to -0.21 | <0.001  |
| Caesarean section         | 56 371 (9.7%)   | -0.88     | -1.00 to -0.75 | <0.001  |

<sup>a</sup>Adjusted for: maternal age, preeclampsia, hypertension, and diabetes mellitus, family disposable income, parental country of birth, parental labour market position, offspring year of birth, parity and birth weight standardized to gestational age and gestational age

### Supplementary Table 9. Sensitivity analysis of the relationship between caesarean section and general cognitive ability.

|                      | N       | $\beta^a$ | 95% CI         | P-value |
|----------------------|---------|-----------|----------------|---------|
| Model 1 <sup>b</sup> | 579 224 | -0.88     | -1.01 to -0.75 | <0.001  |
| Model 2 <sup>c</sup> | 123 032 | -0.98     | -1.25 to -0.72 | <0.001  |
| Model 3 <sup>d</sup> | 123 032 | -0.95     | -1.21 to -0.69 | <0.001  |
| Model 4 <sup>e</sup> | 123 032 | -0.87     | -1.14 to -0.61 | <0.001  |
| Model 5 <sup>f</sup> | 123 032 | -0.94     | -1.20 to -0.67 | <0.001  |
| Model 6 <sup>g</sup> | 123 032 | -0.79     | -1.06 to -0.53 | <0.001  |

<sup>a</sup>Mean difference as compared to those born vaginally

<sup>b</sup>Adjusted for confounders and further adjusted for history of caesarean sections.

<sup>c</sup>Main confounder adjusted analysis repeated in the subset of the cohort (for cross-reference) with available maternal smoking, early pregnancy BMI and gestational weight gain.

<sup>d</sup>Adjusted for confounders and further adjusted for maternal smoking.

<sup>e</sup>Adjusted for confounders and further adjusted for early pregnancy maternal BMI.

<sup>f</sup>Adjusted for confounders and further adjusted for gestational weight gain z-score.

<sup>g</sup>Adjusted for confounders and further jointly adjusted for maternal smoking, maternal early pregnancy BMI and gestational weight gain z-score.

**Supplementary Table 10. Sensitivity analysis of the relationship between caesarean section and general cognitive ability, by gestational age adjustment and gestational age inclusion.**

|                                | $\beta^a$ | 95% CI         | P-value |
|--------------------------------|-----------|----------------|---------|
| Excluding GA adjustment        |           |                |         |
| Any CS                         | -0.97     | -1.09 to -0.85 | <0.001  |
| Elective CS                    | -1.08     | -1.40 to -0.76 | <0.001  |
| Non-elective CS                | -1.15     | -1.45 to -0.84 | <0.001  |
| Excluding BW adjustment        |           |                |         |
| Any CS                         | -0.94     | -1.06 to -0.81 | <0.001  |
| Elective CS                    | -0.93     | -1.26 to -0.61 | <0.001  |
| Non-elective CS                | -1.11     | -1.43 to -0.80 | <0.001  |
| Excluding GA and BW adjustment |           |                |         |
| Any CS                         | -1.06     | -1.18 to -0.94 | <0.001  |
| Elective CS                    | -1.10     | -1.42 to -0.78 | <0.001  |
| Non-elective CS                | -1.24     | -1.54 to -0.93 | <0.001  |

<sup>a</sup>Mean difference as compared to those born vaginally

<sup>b</sup>Adjusted for confounders excluding adjustment for gestational age.

<sup>c</sup>Adjusted for confounders excluding adjustment for birth weight.

<sup>d</sup>Adjusted for confounders excluding adjustment for birth weight and gestational age.

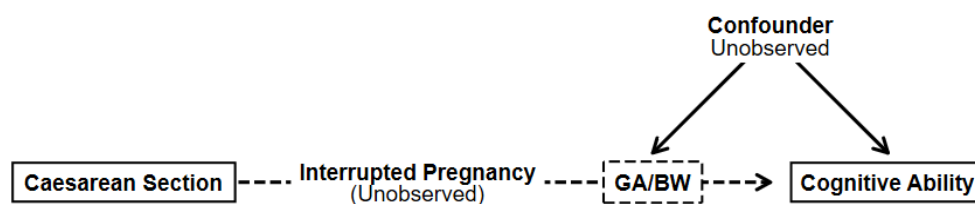

**Supplementary Figure 1. The possible causal relationship between caesarean section and cognitive ability, whereby gestational age (GA) and birth weight (BW) acts as colliders because of a confounder (unobserved) and the iatrogenic effect that caesarean section has on the interruption of pregnancy (unobserved).**

### Supplementary Table 11. Sensitivity analysis of the relationship between caesarean section and general cognitive ability, by gestational age adjustment and gestational age inclusion.

|                                               | N exposed     | $\beta^a$ | 95% CI         | p-value |
|-----------------------------------------------|---------------|-----------|----------------|---------|
| Excluding those born preterm <sup>b</sup>     |               |           |                |         |
| Any CS                                        | 49 442 (8.9%) | -0.85     | -0.98 to -0.72 | <0.001  |
| Elective CS                                   | 7 191 (4.1%)  | -1.05     | -1.39 to -0.72 | <0.001  |
| Non-elective CS                               | 6 550 (3.7%)  | -0.85     | -1.20 to -0.51 | <0.001  |
| Restricted to those born at-term <sup>c</sup> |               |           |                |         |
| Any CS                                        | 48 310 (8.9%) | -0.83     | -0.97 to -0.70 | <0.001  |
| Elective CS                                   | 7 164 (4.1%)  | -1.04     | -1.37 to -0.70 | <0.001  |
| Non-elective CS                               | 6 415 (3.7%)  | -0.85     | -1.20 to -0.50 | <0.001  |

<sup>a</sup>Mean difference as compared to those born vaginally

<sup>b</sup>Adjusted for confounders and excluding those born preterm (<37 weeks).

<sup>c</sup>Adjusted for confounders restricted to those born at-term (37-42 weeks).

### Supplementary Table 12. The difference in the rate of caesarean section between the Swedish Medical Birth Registry and the main cohort.

| Year | Swedish Medical Birth Registry <sup>a</sup> | Main Cohort |
|------|---------------------------------------------|-------------|
| 1973 | 5.3%                                        | 5.3%        |
| 1974 | 6.6%                                        | 6.5%        |
| 1975 | 7.6%                                        | 7.3%        |
| 1976 | 9.4%                                        | 9.2%        |
| 1977 | 10.6%                                       | 10.2%       |
| 1978 | 11.3%                                       | 11.1%       |
| 1979 | 11.4%                                       | 11.0%       |
| 1980 | 11.7%                                       | 11.3%       |
| 1981 | 12.1%                                       | 11.7%       |
| 1982 | 11.9%                                       | 11.4%       |
| 1983 | 12.0%                                       | 11.1%       |
| 1984 | 11.5%                                       | 11.2%       |
| 1985 | 11.8%                                       | 11.4%       |
| 1986 | 11.3%                                       | 10.9%       |
| 1987 | 11.0%                                       | 10.3%       |

<sup>a</sup>Publicly available data from the National Board of Health and Welfare (<https://www.socialstyrelsen.se/en/>)
